# Supplementary material for: Crack Forms Sensitivity-Based Prediction on Subsurface Cracks Depth in Ultrasonic-Vibration-Assisted Grinding of Optical Glasses
Source: MDPI journal article supplement (doi:10.3390/app11167553), 2021-08-17
Supplement: s1 [file s1]

**Table S1.** Experimental grinding and ultrasonic vibration parameters.

| Serial Number | $D_g$ (mm) | $d_a$ ( $\mu\text{m}$ ) | $n$ (r/min) | $V_f$ (mm/min) | $a_p$ ( $\mu\text{m}$ ) | $A$ ( $\mu\text{m}$ ) |
|---------------|------------|-------------------------|-------------|----------------|-------------------------|-----------------------|
| 1             | 4          | 76                      | 1000        | 110            | 60                      | 7                     |
| 2             | 4          | 76                      | 3000        | 110            | 60                      | 7                     |
| 3             | 4          | 76                      | 5000        | 110            | 60                      | 7                     |
| 4             | 4          | 76                      | 7000        | 110            | 60                      | 7                     |
| 5             | 4          | 76                      | 9000        | 110            | 60                      | 7                     |
| 6             | 4          | 76                      | 11000       | 110            | 60                      | 7                     |
| 7             | 4          | 76                      | 13000       | 110            | 60                      | 7                     |
| 8             | 4          | 76                      | 15000       | 110            | 60                      | 7                     |
| 9             | 4          | 76                      | 11000       | 10             | 60                      | 7                     |
| 10            | 4          | 76                      | 11000       | 30             | 60                      | 7                     |
| 11            | 4          | 76                      | 11000       | 50             | 60                      | 7                     |
| 12            | 4          | 76                      | 11000       | 70             | 60                      | 7                     |
| 13            | 4          | 76                      | 11000       | 90             | 60                      | 7                     |
| 14            | 4          | 76                      | 11000       | 110            | 60                      | 7                     |
| 15            | 4          | 76                      | 11000       | 130            | 60                      | 7                     |
| 16            | 4          | 76                      | 11000       | 150            | 60                      | 7                     |
| 17            | 4          | 76                      | 11000       | 110            | 10                      | 7                     |
| 18            | 4          | 76                      | 11000       | 110            | 20                      | 7                     |
| 19            | 4          | 76                      | 11000       | 110            | 30                      | 7                     |
| 20            | 4          | 76                      | 11000       | 110            | 40                      | 7                     |
| 21            | 4          | 76                      | 11000       | 110            | 50                      | 7                     |
| 22            | 4          | 76                      | 11000       | 110            | 60                      | 7                     |
| 23            | 4          | 76                      | 11000       | 110            | 70                      | 7                     |
| 24            | 4          | 76                      | 11000       | 110            | 80                      | 7                     |
| 25            | 4          | 76                      | 11000       | 110            | 60                      | 0                     |
| 26            | 4          | 76                      | 11000       | 110            | 60                      | 1                     |
| 27            | 4          | 76                      | 11000       | 110            | 60                      | 2                     |
| 28            | 4          | 76                      | 11000       | 110            | 60                      | 3                     |
| 29            | 4          | 76                      | 11000       | 110            | 60                      | 4                     |
| 30            | 4          | 76                      | 11000       | 110            | 60                      | 5                     |
| 31            | 4          | 76                      | 11000       | 110            | 60                      | 6                     |
| 32            | 4          | 76                      | 11000       | 110            | 60                      | 7                     |
| 33            | 4          | 46                      | 11000       | 110            | 60                      | 7                     |
| 34            | 4          | 64                      | 11000       | 110            | 60                      | 7                     |
| 35            | 4          | 76                      | 11000       | 110            | 60                      | 7                     |
| 36            | 4          | 91                      | 11000       | 110            | 60                      | 7                     |
| 37            | 2          | 76                      | 11000       | 110            | 60                      | 7                     |
| 38            | 4          | 76                      | 11000       | 110            | 60                      | 7                     |
| 39            | 6          | 76                      | 11000       | 110            | 60                      | 7                     |
| 40            | 8          | 76                      | 11000       | 110            | 60                      | 7                     |
